# Supplementary material
Source: ML conference proceedings conference paper supplement (https://proceedings.neurips.cc/paper_files/paper/2020/hash/6950aa02ae8613af620668146dd11840-Abstract.html)
Supplement: Supplementary file [file 6950aa02ae8613af620668146dd11840-Supplemental.pdf]

---

# Exact Recovery of Mangled Clusters with Same-Cluster Queries (supplementary material)

---

**Marco Bressan**

Dept. of CS, Univ. of Milan, Italy  
marco.bressan@unimi.it

**Nicolò Cesa-Bianchi**

DSRC & Dept. of CS, Univ. of Milan, Italy  
nicolo.cesa-bianchi@unimi.it

**Silvio Lattanzi**

Google  
silviol@google.com

**Andrea Paudice**

Dept. of CS, Univ. of Milan, Italy &  
Istituto Italiano di Tecnologia, Italy  
andrea.paudice@unimi.it

## 1 Ancillary results

### 1.1 VC-dimension of ellipsoids

For any PSD matrix  $M$ , we denote by  $E_M = \{\mathbf{x} \in \mathbb{R}^d : d_M(\mathbf{x}, \boldsymbol{\mu}) \leq 1\}$  the  $\boldsymbol{\mu}$ -centered ellipsoid with semiaxes of length  $\lambda_1^{-1/2}, \dots, \lambda_d^{-1/2}$ , where  $\lambda_1, \dots, \lambda_d \geq 0$  are the eigenvalues of  $M$ . We recall the following classical VC-dimension bound (see, e.g., [3]).

**Theorem 5.** *The VC-dimension of the class  $\mathcal{H} = \{E_M : M \in \mathbb{R}^d, M \succeq 0\}$  of (possibly degenerate) ellipsoids in  $\mathbb{R}^d$  is  $\frac{d^2+3d}{2}$ .*

### 1.2 Generalization error bounds

The next result is a simple adaptation of the classical VC bound for the realizable case (see, e.g., [5, Theorem 6.8]).

**Theorem 6.** *There exists a universal constant  $c > 0$  such that for any family  $\mathcal{H}$  of measurable sets  $E \subset \mathbb{R}^d$  of VC-dimension  $d < \infty$ , any probability distribution  $\mathcal{D}$  on  $\mathbb{R}^d$ , and any  $\varepsilon, \delta \in (0, 1)$ , if  $S$  is a sample of  $m \geq c \frac{d \ln(1/\varepsilon) + \ln(1/\delta)}{\varepsilon}$  points drawn i.i.d. from  $\mathcal{D}$ , then for any  $E^* \in \mathcal{H}$  we have:*

$$\mathcal{D}(E \triangle E^*) \leq \varepsilon \quad \text{and} \quad \mathcal{D}(E' \setminus E^*) \leq \varepsilon$$

*with probability at least  $1 - \delta$  with respect to the random draw of  $S$ , where  $E$  is any element of  $\mathcal{H}$  such that  $E \cap S = E^* \cap S$ , and  $E'$  is any element of  $\mathcal{H}$  such that  $E^* \cap S \subseteq E' \cap S$ .*

The first inequality is the classical PAC bound for the zero-one loss, which uses the fact that the VC dimension of  $\{E \triangle E^* : E \in \mathcal{H}\}$  is the same as the VC dimension of  $\mathcal{H}$ . The second inequality follows immediately from the same proof by noting that, for any  $E^* \in \mathcal{H}$  the VC dimension of  $\{E \setminus E^* : E \in \mathcal{H}\}$  is not larger than the VC dimension of  $\mathcal{H}$  because, for any sample  $S$  and for any  $F, G \in \mathcal{H}$ ,  $(F \setminus E^*) \cap S \neq (G \setminus E^*) \cap S$  implies  $F \cap S \neq G \cap S$ .

### 1.3 Concentration bounds

We recall standard concentration bounds for non-positively correlated binary random variables, see [2]. Let  $X_1, \dots, X_n$  be binary random variables. We say that  $X_1, \dots, X_n$  are non-positively

correlated if for all  $I \subseteq \{1, \dots, n\}$  we have:

$$\mathbb{P}(\forall i \in I : X_i = 0) \leq \prod_{i \in I} \mathbb{P}(X_i = 0) \quad \text{and} \quad \mathbb{P}(\forall i \in I : X_i = 1) \leq \prod_{i \in I} \mathbb{P}(X_i = 1) \quad (1)$$

**Lemma 4** (Chernoff bounds). *Let  $X_1, \dots, X_n$  be non-positively correlated binary random variables. Let  $a_1, \dots, a_n \in [0, 1]$  and  $X = \sum_{i=1}^n a_i X_i$ . Then, for any  $\varepsilon > 0$ , we have:*

$$\mathbb{P}(X < (1 - \varepsilon)\mathbb{E}[X]) < e^{-\frac{\varepsilon^2}{2}\mathbb{E}[X]} \quad (2)$$

$$\mathbb{P}(X > (1 + \varepsilon)\mathbb{E}[X]) < e^{-\frac{\varepsilon^2}{2+\varepsilon}\mathbb{E}[X]} \quad (3)$$

## 1.4 Yao's minimax principle

We recall Yao's minimax principle for Monte Carlo algorithms. Let  $\mathcal{A}$  be a finite family of deterministic algorithms and  $\mathcal{I}$  a finite family of problem instances. Fix any two distributions  $\mathbf{p}$  over  $\mathcal{I}$  and  $\mathbf{q}$  over  $\mathcal{A}$ , and any  $\delta \in [0, 1/2]$ . Let  $\min_{A \in \mathcal{A}} \mathbb{E}_{I \sim \mathbf{p}}[C_\delta(I, A)]$  be the minimum, over every algorithm  $A$  that fails with probability at most  $\delta$  over the input distribution  $\mathbf{p}$ , of the expected cost of  $A$  over the input distribution itself. Similarly, let  $\max_{I \in \mathcal{I}} \mathbb{E}_{A \sim \mathbf{q}}[C_\delta(I, A)]$  be the expected cost of the randomized algorithm defined by  $\mathbf{q}$  under its worst input from  $\mathcal{I}$ , assuming it fails with probability at most  $\delta$ . Then (see [4], Proposition 2.6):

$$\max_{I \in \mathcal{I}} \mathbb{E}_{\mathbf{q}}[C_\delta(I, A)] \geq \frac{1}{2} \min_{A \in \mathcal{A}} \mathbb{E}_{\mathbf{p}}[C_{2\delta}(I, A)] \quad (4)$$

## 2 Supplementary material for Section 5

### 2.1 Monochromatic Tessellation

We give a formal version of the claim about the monochromatic tessellation of Section 5:

**Theorem 7.** *Suppose we are given an ellipsoid  $E$  such that  $\frac{1}{d\Phi}E \subset \text{conv}(S_C) \subset E$  for some stretch factor  $\Phi > 0$ . Then for a suitable choice of  $\beta_i, \rho, b$ , the tessellation  $\mathcal{R}$  of the positive orthant of  $E$  (Definition 3) satisfies:*

- (1)  $|\mathcal{R}| \leq \max\{1, O\left(\frac{d\Phi}{\gamma} \ln \frac{d\Phi}{\gamma}\right)^d\}$
- (2)  $E \cap \mathbb{R}_+^d \subseteq \cup_{R \in \mathcal{R}} R$
- (3) for every  $R \in \mathcal{R}$ , the set  $R \cap E$  is monochromatic

In order to prove Theorem 7, we define the tessellation and prove properties (1-3) for  $\gamma \leq 1/2$ . For  $\gamma > 1/2$  the tessellation is defined as for  $\gamma = 1/2$ , and one can check all properties still hold. In the proof we use a constant  $c = \sqrt{5}$  and assume  $\gamma < c^2 - 2c$ , which is satisfied since  $c^2 - 2c = 5 - 2\sqrt{5} > 1/2$ .

First of all, we define the intervals  $T_i$ . The base  $i$ -th coordinate is:

$$\beta_i = \frac{\gamma}{c\sqrt{2d}} \frac{L_i}{\Phi d} \quad (5)$$

Note that, for all  $i$ ,

$$\frac{L_i}{\beta_i} = \frac{\Phi c d \sqrt{2d}}{\gamma} \quad (6)$$

Define:

$$\alpha = \frac{\gamma}{c\sqrt{2}\Phi d} \quad (7)$$

and let:

$$b = \max\left(0, \left\lceil \log_{1+\alpha}\left(\frac{c\Phi d \sqrt{2d}}{\gamma}\right) \right\rceil\right) \quad (8)$$

(The parameter  $\rho$  of the informal description of Section 5 is exactly  $1 + \alpha$ ). Finally, define the interval set along the  $i$ -th axis as:

$$T_i = \begin{cases} \{[0, \beta_i]\} & \text{if } b = 0 \\ \{[0, \beta_i], (\beta_i, \beta_i(1 + \alpha)], \dots, (\beta_i(1 + \alpha)^{b-1}, \beta_i(1 + \alpha)^b)\} & \text{if } b \geq 1 \end{cases} \quad (9)$$

**Proof of (1).** By construction,  $|T_i| = b + 1$ . Thus,  $|\mathcal{R}| = \prod_{i \in [d]} |T_i| = (b + 1)^d$ . Thus, if  $b = 0$  then  $|\mathcal{R}| = 1$ , else by (8) and 6,

$$b = \left\lceil \frac{\ln\left(\frac{c\Phi d\sqrt{2d}}{\gamma}\right)}{\ln(1 + \alpha)} \right\rceil \quad (10)$$

$$\leq \left\lceil \frac{2}{\alpha} \ln\left(\frac{c\Phi d\sqrt{2d}}{\gamma}\right) \right\rceil \quad \text{since } \ln(1 + \alpha) \geq \alpha/2 \text{ as } \alpha \leq 1 \quad (11)$$

$$= \left\lceil \frac{2\sqrt{2}c\Phi d}{\gamma} \ln \frac{c\Phi d\sqrt{2d}}{\gamma} \right\rceil \quad \text{definition of } \alpha \quad (12)$$

$$= O\left(\frac{d\Phi}{\gamma} \ln \frac{d\Phi}{\gamma}\right) \quad \text{since } d\Phi \geq 1, \gamma \leq 1/2 \quad (13)$$

in which case  $|\mathcal{R}| = O\left(\frac{d\Phi}{\gamma} \ln \frac{d\Phi}{\gamma}\right)^d$ . Taking the maximum over the two cases proves the claim.

**Proof of (2).** We show for any  $\mathbf{x} \in E \cap \mathbb{R}_+^d$  there exists  $R \in \mathcal{R}$  containing  $\mathbf{x}$ . Clearly, if  $\mathbf{x} \in E \cap \mathbb{R}_+^d$ , then  $\langle \mathbf{x}, \mathbf{u}_i \rangle \in [0, L_i]$  for all  $i \in [d]$ . But  $T_i$  covers, along the  $i$ -th direction  $\mathbf{u}_i$ , the interval from 0 to

$$\beta_i(1 + \alpha)^b = \beta_i(1 + \alpha)^{\max(0, \lceil \log_{1+\alpha}(L_i/\beta_i) \rceil)} \geq \beta_i(1 + \alpha)^{\lceil \log_{1+\alpha}(L_i/\beta_i) \rceil} \geq L_i \quad (14)$$

Therefore some  $R \in \mathcal{R}$  contains  $\mathbf{x}$ .

**Proof of (3).** Given any hyperrectangle  $R \in \mathcal{R}$ , we show that the existence of  $\mathbf{x}, \mathbf{y} \in R \cap E$  with  $\mathbf{x} \in C$  and  $\mathbf{y} \notin C$  leads to a contradiction. For the sake of the analysis we conventionally set the origin at the center  $\boldsymbol{\mu}$  of  $E$ , i.e. we assume  $\boldsymbol{\mu} = \mathbf{0}$ .

We define  $E_{\text{in}} = \frac{1}{\Phi_d} E$  and let  $M = U\Lambda U^\top$  be its PSD matrix, where  $U = [\mathbf{u}_1, \dots, \mathbf{u}_d]$  and  $\Lambda = \text{diag}(\lambda_1, \dots, \lambda_d)$ . Note that  $\lambda_i = \frac{1}{\ell_i^2} = \frac{\Phi^2 d^2}{L_i^2}$  where  $\ell_i = \frac{L_i}{\Phi_d}$  is the length of the  $i$ -th semiaxis of  $E_{\text{in}}$ . For any  $R \in \mathcal{R}$ , let  $R_i$  be the projection of  $R$  on  $\mathbf{u}_i$  (i.e.  $R_i$  is one of the intervals of  $T_i$  defined in (9)). Let  $D = D(R) = \{i \in [d] : 0 \notin R_i\}$ . We let  $U_D$  and  $U_{-D}$  be the matrices obtained by zeroing out the columns of  $U$  corresponding to the indices in  $[d] \setminus D$  and  $D$ , respectively. Observe that if  $\mathbf{x}, \mathbf{y} \in R \cap E$  then:

$$\langle \mathbf{x} - \mathbf{y}, \mathbf{u}_i \rangle^2 < \alpha^2 \langle \mathbf{x}, \mathbf{u}_i \rangle^2 \quad \forall i \in D \quad (15)$$

$$\langle \mathbf{x} - \mathbf{y}, \mathbf{u}_i \rangle^2 \leq \beta_i^2 \quad \forall i \notin D \quad (16)$$

Now suppose  $C$  has margin at least  $\gamma$  for some  $\gamma \in (0, c^2 - 2c]$ , and suppose  $\mathbf{x}, \mathbf{y} \in R \cap E$  with  $\mathbf{x} \in C$  and  $\mathbf{y} \notin C$ . Through a set of ancillary lemmata proven below, this leads to the absurd:

$$\frac{\gamma^2}{c^2} < d_W(\mathbf{y}, \mathbf{x})^2 \quad \text{Lemma 5} \quad (17)$$

$$\leq d_M(\mathbf{y}, \mathbf{x})^2 \quad \text{Lemma 6} \quad (18)$$

$$< \alpha^2 d_M(\mathbf{x}, \boldsymbol{\mu})^2 + \frac{\gamma^2}{2c^2} \quad \text{Lemma 7} \quad (19)$$

$$\leq \frac{\gamma^2}{2c^2} + \frac{\gamma^2}{2c^2} \quad \text{Lemma 8} \quad (20)$$

In the rest of the proof we prove the four lemmata.

**Lemma 5.**  $\frac{\gamma}{c} < d_W(\mathbf{y}, \mathbf{x})$ .

*Proof.* Let  $\mathbf{z}$  be the point w.r.t. which the margin of  $C$  holds. By the margin assumption,

$$d_W(\mathbf{y}, \mathbf{z}) > \sqrt{1 + \gamma} \quad \text{and} \quad d_W(\mathbf{x}, \mathbf{z}) \leq 1 \quad (21)$$

By the triangle inequality then,

$$d_W(\mathbf{y}, \mathbf{x}) \geq d_W(\mathbf{y}, \mathbf{z}) - d_W(\mathbf{x}, \mathbf{z}) > \sqrt{1 + \gamma} - 1 \quad (22)$$

One can check that for  $\gamma \leq c^2 - 2c$  we have  $1 + \gamma \geq (1 + \frac{\gamma}{c})^2$ . Therefore

$$d_W(\mathbf{y}, \mathbf{x}) > \sqrt{(1 + \gamma/c)^2} - 1 = \frac{\gamma}{c} \quad (23)$$

as desired.  $\square$

**Lemma 6.**  $d_W(\cdot) \leq d_M(\cdot)$ .

*Proof.* By the assumptions of the theorem,  $E_{\text{in}} \subseteq \text{conv}_{\mu}(C)$ . Moreover, by the assumptions on  $d_W(\cdot)$ , the unit ball of  $d_W(\cdot)$  contains  $\text{conv}(C)$ . Thus, the unit ball of  $d_W(\cdot)$  contains the unit ball of  $d_M(\cdot)$ . This implies  $W \preceq M$ , thus  $\|\cdot\|_W \leq \|\cdot\|_M$  and  $d_W(\cdot) \leq d_M(\cdot)$ .  $\square$

**Lemma 7.**  $d_M(\mathbf{y}, \mathbf{x})^2 < \alpha^2 d_M(\mathbf{x}, \boldsymbol{\mu})^2 + \frac{\gamma^2}{2c^2}$ .

*Proof.* We decompose  $d_M(\mathbf{y}, \mathbf{x})^2$  along the colspaces of  $U_D$  and  $U_{-D}$ :

$$d_M(\mathbf{y}, \mathbf{x})^2 = \|M^{1/2}(\mathbf{y} - \mathbf{x})\|_2^2 \quad (24)$$

$$= \|M^{1/2}(\mathbf{y} - \mathbf{x})\|_{U_D U_D^\top}^2 + \|M^{1/2}(\mathbf{y} - \mathbf{x})\|_{U_{-D} U_{-D}^\top}^2 \quad (25)$$

Next, we bound the two terms of (25). To this end, we need to show that for all  $D \subseteq [d]$  and  $\mathbf{v} \in \mathbb{R}^d$ :

$$\|M^{1/2} \mathbf{v}\|_{U_D U_D^\top}^2 = \sum_{i \in D} \lambda_i \langle \mathbf{v}, \mathbf{u}_i \rangle^2 \quad (26)$$

Let indeed  $J_D = \text{diag}(\mathbf{1}_D)$  be the selection matrix corresponding to the indices of  $D$ . Then  $U_D = U J_D$ , and so  $U^\top U_D = U^\top U J_D = J_D$ . This gives:

$$\|M^{1/2} \mathbf{v}\|_{U_D U_D^\top}^2 = \mathbf{v}^\top (U \Lambda^{1/2} U^\top) U_D U_D^\top (U \Lambda^{1/2} U^\top) \mathbf{v} \quad \text{definition of } M \text{ and } \|\cdot\|. \quad (27)$$

$$= \mathbf{v}^\top U \Lambda^{1/2} J_D J_D \Lambda^{1/2} U^\top \mathbf{v} \quad \text{since } U^\top U_D = J_D \quad (28)$$

$$= \mathbf{v}^\top U J_D \Lambda^{1/2} \Lambda^{1/2} J_D U^\top \mathbf{v} \quad \text{since } \Lambda, J_D \text{ are diagonal} \quad (29)$$

$$= \mathbf{v}^\top U_D \Lambda U_D^\top \mathbf{v} \quad \text{since } U J_D = U_D \quad (30)$$

$$= \|U_D^\top \mathbf{v}\|_\Lambda^2 \quad \text{by definition} \quad (31)$$

$$= \sum_{i \in D} \lambda_i \langle \mathbf{v}, \mathbf{u}_i \rangle^2 \quad (32)$$

Now we can bound the first term of (25):

$$\|M^{1/2}(\mathbf{y} - \mathbf{x})\|_{U_D U_D^\top}^2 = \sum_{i \in D} \lambda_i \langle \mathbf{y} - \mathbf{x}, \mathbf{u}_i \rangle^2 \quad \text{by (32)} \quad (33)$$

$$< \alpha^2 \sum_{i \in D} \lambda_i \langle \mathbf{x}, \mathbf{u}_i \rangle^2 \quad \text{by (15)} \quad (34)$$

$$= \alpha^2 \|M^{1/2} \mathbf{x}\|_{U_D U_D^\top}^2 \quad \text{by (32)} \quad (35)$$

$$\leq \alpha^2 \|M^{1/2} \mathbf{x}\|_{U U^\top}^2 \quad (36)$$

$$= \alpha^2 \|M^{1/2} \mathbf{x}\|_2^2 \quad \text{since } U U^\top = I \quad (37)$$

$$= \alpha^2 d_M^2(\mathbf{x}, \boldsymbol{\mu}) \quad \text{since } \boldsymbol{\mu} = \mathbf{0} \quad (38)$$

And for the second term of (25), we have:

$$\|M^{1/2}(\mathbf{y} - \mathbf{x})\|_{U_{-D}U_{-D}^\top}^2 = \sum_{i \notin D} \lambda_i \langle \mathbf{y} - \mathbf{x}, \mathbf{u}_i \rangle^2 \quad \text{by (32)} \quad (39)$$

$$\leq \sum_{i \notin D} \lambda_i \beta_i^2 \quad \text{by (16)} \quad (40)$$

$$= \sum_{i \notin D} \frac{\Phi^2 d^2}{L_i^2} \left( \frac{\gamma}{c\sqrt{2d}} \frac{L_i}{\Phi d} \right)^2 \quad \text{by definition of } \lambda_i \text{ and } \beta_i \quad (41)$$

$$= \sum_{i \notin D} \frac{\gamma^2}{2dc^2} \quad (42)$$

$$\leq \frac{\gamma^2}{2c^2} \quad (43)$$

Summing the bounds on the two terms shows that  $d_M(\mathbf{y}, \mathbf{x})^2 < \alpha^2 d_M(\mathbf{x}, \boldsymbol{\mu})^2 + \frac{\gamma^2}{2c^2}$ , as claimed.  $\square$

**Lemma 8.**  $\alpha^2 d_M(\mathbf{x}, \boldsymbol{\mu})^2 \leq \frac{\gamma^2}{2c^2}$ .

*Proof.* By construction we have  $\mathbf{x} \in E$  and  $E = \Phi d \cdot E_{\text{in}}$ . Therefore  $\frac{1}{\Phi d} \mathbf{x} \in E_{\text{in}}$ , that is:

$$1 \geq d_M\left(\frac{1}{\Phi d} \mathbf{x}, \boldsymbol{\mu}\right)^2 = \frac{1}{\Phi^2 d^2} d_M(\mathbf{x}, \boldsymbol{\mu})^2 \quad (44)$$

where we used the fact that  $d_M(\cdot, \boldsymbol{\mu})^2 = \|\cdot\|_M^2$  since  $\boldsymbol{\mu} = \mathbf{0}$ . Rearranging terms, this proves that  $d_M(\mathbf{x}, \boldsymbol{\mu})^2 \leq \Phi^2 d^2$ . Multiplying by  $\alpha^2$ , we obtain:

$$\alpha^2 d_M(\mathbf{x}, \boldsymbol{\mu})^2 \leq \left( \frac{\gamma}{\sqrt{2c}\Phi d} \right)^2 \Phi^2 d^2 = \frac{\gamma^2}{2c^2} \quad (45)$$

as desired.  $\square$

The proof of the theorem is complete.

## 2.2 Low-stretch separators and proof of Theorem 3

In this section we show how to compute the separator of Theorem 3. In fact, computing the separator is easy; the nontrivial part is Theorem 3 itself, that is, showing that such a separator always exists.

To compute the separator we first compute the MVEE  $E_J = (M^*, \boldsymbol{\mu}^*)$  of  $S_C$  (see Section 5). We then solve the following semidefinite program:

$$\begin{aligned} & \max_{\alpha \in \mathbb{R}, \boldsymbol{\mu} \in \mathbb{R}^d, M \in \mathbb{R}^{d \times d}} \alpha \\ \text{s.t. } & M \succeq \alpha M^* \\ & \langle M, (\mathbf{x} - \boldsymbol{\mu})(\mathbf{x} - \boldsymbol{\mu})^\top \rangle \leq 1 \quad \forall \mathbf{x} \in S_C \\ & \langle M, (\mathbf{y} - \boldsymbol{\mu})(\mathbf{y} - \boldsymbol{\mu})^\top \rangle > 1 \quad \forall \mathbf{y} \in S_{\bar{C}} \end{aligned} \quad (46)$$

where, for any two symmetric matrices  $A$  and  $B$ ,  $\langle A, B \rangle = \text{tr}(AB)$  is the usual Frobenius inner product, implying  $\langle M, (\mathbf{x} - \boldsymbol{\mu})(\mathbf{x} - \boldsymbol{\mu})^\top \rangle = d_M(\mathbf{x}, \boldsymbol{\mu})^2$ . In words, the constraint  $M \succeq \alpha M^*$  says that  $E$  must fit into  $E_J$  if we scale  $E_J$  by a factor  $\Phi = 1/\sqrt{\alpha}$ . The other constraints require  $E$  to contain all of  $S_C$  but none of the points of  $S_{\bar{C}}$ . The objective function thus minimizes the stretch  $\Phi$  of  $E$ .

In the rest of this paragraph we prove Theorem 3.

**Proof of Theorem 3 (sketch).** To build the intuition, we first give a proof sketch where the involved quantities are simplified. The analysis is performed in the latent space  $\mathbb{R}^d$  with inner product  $\langle \mathbf{u}, \mathbf{v} \rangle = \mathbf{u}^\top W \mathbf{v}$ . Setting conventionally  $\mathbf{z} = \mathbf{0}$ ,  $C$  then lies in the unit ball  $\mathcal{B}_0$  and all points of  $X \setminus C$  lie outside  $\sqrt{1+\gamma} \mathcal{B}_0$ . For simplicity we assume  $\gamma \ll 1$  so that  $\sqrt{1+\gamma} \simeq 1+\gamma$ , but we can easily extend the result to any  $\gamma > 0$ . Now fix the subset  $S_C \subseteq C$ , and let  $E_J = E_J(S_C)$  be the MVEE of  $S_C$ . Observe the following fact:  $\mathcal{B}_0$  trivially satisfies (1), but in general violates (2); in contrast,  $E_J$  trivially satisfies (2), but in general violates (1). The key idea is thus to “compare”  $\mathcal{B}_0$  and  $E_J$  and take, loosely speaking, the best of the two. To see how this works, suppose for instance  $E_J$  has small radius, say less than  $\gamma/4$ . In this case,  $E = E_J$  yields the thesis. Indeed, since the center  $\boldsymbol{\mu}^*$  of  $E_J$  is in  $\mathcal{B}_0$ , then any point of  $E$  is within distance  $1 + \gamma/4 \leq \sqrt{1+\gamma}$  of the center of  $\mathcal{B}_0$ , and lies inside  $\sqrt{1+\gamma} \mathcal{B}_0$ . Thus  $E_J$  separates  $S_C$  from  $X \setminus C$ , satisfying (1). At the other extreme, suppose  $E_J$  is large, say with all its  $d$  semiaxes longer than  $\gamma/4$ . In this case,  $E = \mathcal{B}_0$  yields the thesis: indeed, by hypothesis  $E$  fits entirely inside  $4/\gamma E_J$ , satisfying (2). Unfortunately, the general case is more complex, since  $E_J$  may be large along some axes and small along others. In this case, both  $\mathcal{B}_0$  and  $E_J$  fail to satisfy the properties. This requires us to choose the axes and the center of  $E$  more carefully. We show how to do this with the help of Figure 1.

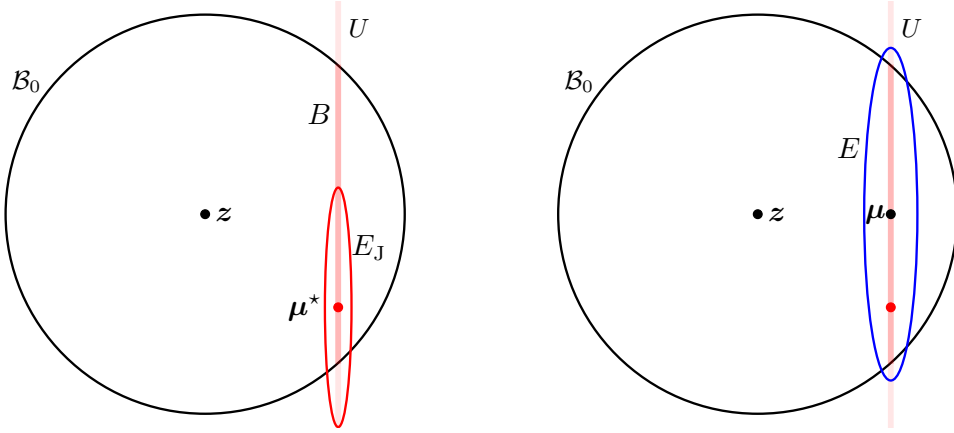

Figure 1: Left: the MVEE  $E_J$  of  $S_C$  and the affine subspace  $U + \boldsymbol{\mu}^*$  (marked simply as  $U$ ) spanned by its largest semiaxes. There is no guarantee that  $E_J \subseteq \sqrt{1+\gamma} \mathcal{B}_0$ . Right: the separator  $E$ , centered in the center  $\boldsymbol{\mu}$  of  $B$ , with the largest semiaxis in  $U$  and the smallest one in  $U_\perp$ . We can guarantee that  $S_C \subset E \subset \sqrt{1+\gamma} \mathcal{B}_0$ .

Let  $\{\mathbf{u}_1, \dots, \mathbf{u}_d\}$  be the orthonormal basis defined by the semiaxes of  $E_J$  and  $\ell_1^*, \dots, \ell_d^*$  be the corresponding semiaxes lengths. We define a threshold  $\varepsilon = \gamma^3/d^2$ , and partition  $\{\mathbf{u}_1, \dots, \mathbf{u}_d\}$  as  $A_P = \{i : \ell_i^* > \varepsilon\}$  and  $A_Q = \{i : \ell_i^* \leq \varepsilon\}$ . Thus  $A_P$  contains the large semiaxes of  $E_J$  and  $A_Q$  the small ones. Let  $U, U_\perp$  be the subspaces spanned by  $\{\mathbf{u}_i : i \in A_P\}$  and  $\{\mathbf{u}_i : i \in A_Q\}$ , respectively. Consider the subset  $B = \mathcal{B}_0 \cap (\boldsymbol{\mu}^* + U)$ . Note that  $B$  is a ball in at most  $d$  dimensions, since it is the intersection of a  $d$ -dimensional ball and an affine linear subspace of  $\mathbb{R}^d$ . Let  $\boldsymbol{\mu}$  and  $\ell$  be, respectively, the center and radius of  $B$ . We set the center of  $E$  at  $\boldsymbol{\mu}$ , and the lengths  $\ell_i$  of its semiaxes as follows:

$$\ell_i = \begin{cases} \frac{\ell}{\sqrt{1+\gamma}} & \text{if } i \in A_P \\ \frac{\ell_i^*}{\sqrt{\varepsilon}} & \text{if } i \in A_Q \end{cases} \quad (47)$$

Loosely speaking, we are “copying” the semiaxes from either  $\mathcal{B}_0$  or  $E_J$  depending on  $\ell_i^*$ . In particular, the large semiaxes (in  $A_P$ ) are set so to contain all of  $B$  and exceed it by a little, taking care of not intersecting  $\sqrt{1+\gamma} \mathcal{B}_0$ . Instead, the small semiaxes (in  $A_Q$ ) are so small that we can safely set them to  $1/\sqrt{\varepsilon}$  times those of  $E_J$ , so that we add some “slack” to include  $S_C$  without risking to intersect  $\sqrt{1+\gamma} \mathcal{B}_0$ . Now we are done, and our low-stretch separator is  $(M, \boldsymbol{\mu})$  where  $M = \sum_{i=1}^d \ell_i^{-2} \mathbf{u}_i \mathbf{u}_i^\top$ . This the ellipsoid  $E$  that yields Theorem 3. In the next paragraph, we show how we can find efficiently all points in  $E$  that belong to  $C$ .

### 2.3 Proof of Theorem 3 (full).

We prove the theorem for  $\gamma \leq 1/5$  and use the fact that whenever  $C$  has weak margin  $\gamma$  then it also has weak margin  $\gamma'$  for all  $\gamma' > \gamma$ . As announced, the analysis is carried out in the latent space  $\mathbb{R}^d$  equipped with the inner product  $\langle \mathbf{u}, \mathbf{v} \rangle = \mathbf{u}^\top W \mathbf{v}$ . All norms  $\|\mathbf{u}\|$ , distances  $d(\mathbf{u}, \mathbf{v})$ , and (cosine of) angles  $\langle \mathbf{u}, \mathbf{v} \rangle / (\|\mathbf{u}\| \|\mathbf{v}\|)$  are computed according to this inner product unless otherwise specified. Let  $\mathcal{B}_0$  be the unit ball centered at the origin, which we conventionally set at  $\mathbf{z}$ , the point in the convex hull of  $C$  according to which the margin is computed. Then, by assumption,  $C \subset \mathcal{B}_0$ , and  $\mathbf{x} \notin \sqrt{1+\gamma} \mathcal{B}_0$  for all  $\mathbf{x} \notin C$ . For ease of notation, in this proof we denote the MVEE by  $E^*$  rather than  $E_J$ . Let then  $(E^*, \boldsymbol{\mu}^*)$  be the MVEE of  $S_C$ ; note that  $\boldsymbol{\mu}^* \in \text{conv}(S_C) \subseteq \mathcal{B}_0$ . We let  $\mathbf{u}_1, \dots, \mathbf{u}_d$  be the orthonormal eigenvector basis given by the axes of  $E^*$  and  $\lambda_1^*, \dots, \lambda_d^*$  the corresponding eigenvalues. Note that if  $\min_i \lambda_i^* \geq 5/\gamma^2$  then  $E^*$  has radius  $\leq \gamma/\sqrt{5}$  and thus, since  $\boldsymbol{\mu}^* \in \mathcal{B}_0$  and  $\gamma \leq 1/5$ , its distance from  $\mathcal{B}_0$  is at most  $1 + \gamma/\sqrt{5} = \sqrt{1 + 2\gamma/\sqrt{5} + \gamma^2/5} < \sqrt{1+\gamma}$ . In this case we can simply set  $E = E^*$  and the thesis is proven. Thus, from now on we assume  $\min_i \lambda_i^* < 5/\gamma^2$ .

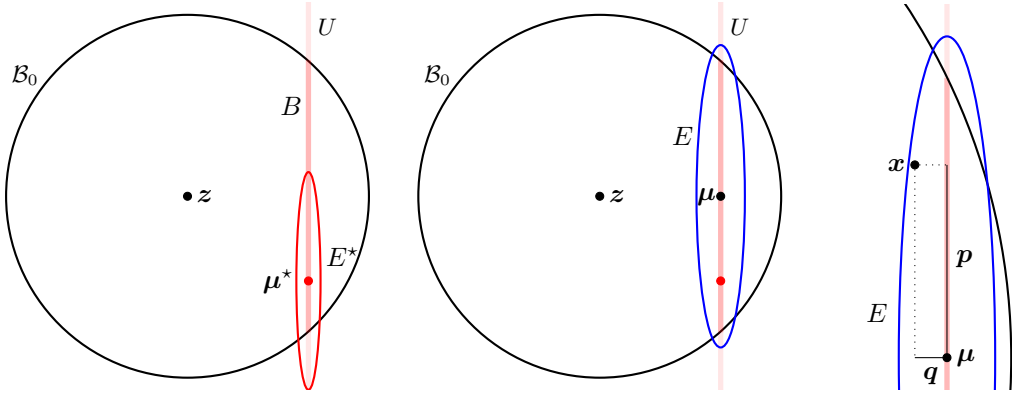

Figure 2: Left: the separating ball  $\mathcal{B}_0$  of  $C$ , the MVEE  $E^*$  of  $S_C$ , and the affine subspace  $U + \boldsymbol{\mu}^*$  spanned by its largest semi-axes. Middle:  $E$  is our separator centered in the center  $\boldsymbol{\mu}$  of the ball  $B = U \cap \mathcal{B}_0$ . Right: a point  $\mathbf{x} \in S_C$  with its projections onto  $U$  and  $U_\perp$  with respect to the origin, which we conventionally set at  $\boldsymbol{\mu}$  (the center of  $E$ ).

Now let:

$$\varepsilon = \frac{\gamma^3}{32d^2} \quad (48)$$

and partition (the indices of) the basis  $\{\mathbf{u}_1, \dots, \mathbf{u}_d\}$  as follows:

$$A_P = \{i : \lambda_i^* < 1/\varepsilon^2\}, \quad A_Q = [d] \setminus A_P \quad (49)$$

Since  $\min_i \lambda_i^* < 5/\gamma^2$  and  $5/\gamma^2 \leq 1/\varepsilon^2$ , then by construction the set  $A_P$  is not empty. We now define the ellipsoid  $E$ . Let  $U, U_\perp$  be the subspaces spanned by  $\{\mathbf{u}_i : i \in A_P\}$  and  $\{\mathbf{u}_i : i \in A_Q\}$  respectively, and let  $B = \mathcal{B}_0 \cap (\boldsymbol{\mu}^* + U)$ . Note that  $B$  is a ball, since it is the intersection of a ball and an affine linear subspace. Let  $\boldsymbol{\mu}$  and  $\ell$  be, respectively, the center and radius of  $B$  and define

$$\lambda_i = \begin{cases} (1 - \sqrt{5\gamma/4})\ell^{-2} & i \in A_P \\ \varepsilon\lambda_i^* & i \in A_Q \end{cases} \quad M = \sum_{i=1}^d \lambda_i \mathbf{u}_i \mathbf{u}_i^\top \quad (50)$$

Then our ellipsoidal separator is  $E = \{\mathbf{x} \in \mathbb{R}^d : d_M(\mathbf{x}, \boldsymbol{\mu}) \leq 1\}$ . See Figure 2 for a pictorial representation. We now prove that  $E$  satisfies: **(1)**  $S_C \subset E$ , **(2)**  $E \subseteq \frac{64\sqrt{2}d^2}{\gamma^3} E^*(S_C)$ , **(3)**  $E \subset \sqrt{1+\gamma} \mathcal{B}_0$ .

**Proof of (1).** Set the center  $\boldsymbol{\mu}$  of  $E$  as the origin. For all  $i \in [d]$  let  $U_i = \mathbf{u}_i \mathbf{u}_i^\top$  and define the following matrices:

$$P_0 = \sum_{i \in A_P} U_i, \quad Q_0 = \sum_{i \in A_Q} U_i \quad (51)$$

$$P = \sum_{i \in A_P} \lambda_i U_i, \quad Q = \sum_{i \in A_Q} \lambda_i U_i \quad (52)$$

$$P_\star = \sum_{i \in A_P} \lambda_i^\star U_i, \quad Q_\star = \sum_{i \in A_Q} \lambda_i^\star U_i \quad (53)$$

We want to show that  $d_M^2(\mathbf{x}, \boldsymbol{\mu}) \leq 1$  for all  $\mathbf{x} \in S_C$ . Note that  $d_M(\mathbf{x}, \boldsymbol{\mu})^2$  equals (recall that  $\boldsymbol{\mu} = \mathbf{0}$ ):

$$\mathbf{x}^\top P \mathbf{x} + \mathbf{x}^\top Q \mathbf{x} \quad (54)$$

Let us start with the second term of (54). By definition of  $Q_\star$  and since  $\boldsymbol{\mu}^{\star\top} Q_\star = (\boldsymbol{\mu}^\star - \boldsymbol{\mu})^\top Q_\star = \mathbf{0}$  because  $\boldsymbol{\mu}^\star - \boldsymbol{\mu} \in U$ ,

$$\mathbf{x}^\top Q \mathbf{x} = \varepsilon \mathbf{x}^\top Q_\star \mathbf{x} = \varepsilon (\mathbf{x} - \boldsymbol{\mu}^\star)^\top Q_\star (\mathbf{x} - \boldsymbol{\mu}^\star) \leq \varepsilon < \frac{\gamma}{4} \quad (55)$$

where the penultimate inequality follows from  $\mathbf{x} \in E^\star$ .

We turn to the first term of (54). If we let  $\mathbf{p}, \mathbf{q}$  be the projections of  $\mathbf{x} - \boldsymbol{\mu} = \mathbf{x}$  onto  $U, U_\perp$ , so that

$$\|\mathbf{p}\|^2 = \mathbf{x}^\top P_0 \mathbf{x}, \quad \|\mathbf{q}\|^2 = \mathbf{x}^\top Q_0 \mathbf{x} \quad (56)$$

then by definition of the  $\lambda_i$  we have:

$$\mathbf{x}^\top P \mathbf{x} = \frac{1 - \sqrt{5\gamma/4}}{\ell^2} \|\mathbf{p}\|^2 \quad (57)$$

We can thus focus on bounding  $\|\mathbf{p}\|$ . Since  $B$  is a ball of radius  $\ell$ , then  $\|\mathbf{p}\| \leq \ell + d(\mathbf{p}, B)$ , where  $d(\mathbf{p}, B)$  is the distance of  $\mathbf{p}$  from its projection on  $B$ —see Figure 3, left.

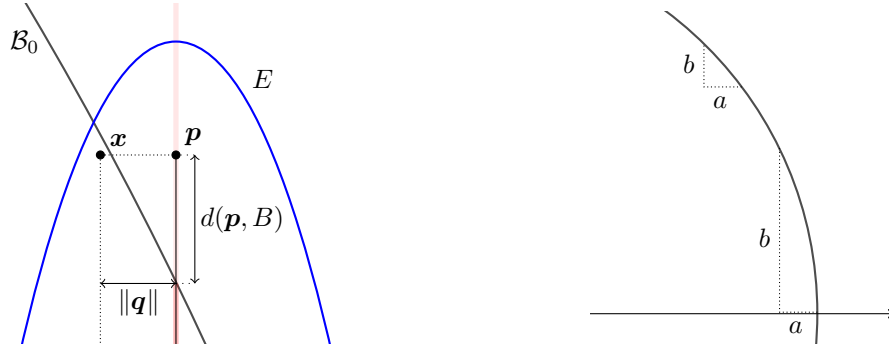

Figure 3: Left: a point  $\mathbf{x} \in S_C \subset \mathcal{B}_0$  which lies in  $E$  as well. Right: for a fixed  $a > 0$ , the ratio  $b/a$  is maximized when the segment of length  $a$  lies on the line passing through the center of  $\mathcal{B}_0$ , in which case  $b/a = \frac{\sin \theta}{1 - \cos \theta}$  for some  $\theta \in (0, \pi/2)$ .

Now, since  $\mathbf{x} \in \mathcal{B}_0$ , the ratio  $\frac{d(\mathbf{p}, B)}{\|\mathbf{q}\|}$  is maximized when  $\ell \rightarrow 0$  (i.e.,  $B$  has a vanishing radius), in which case  $d(\mathbf{p}, B) \leq \sin \theta$  and  $\|\mathbf{q}\| \geq 1 - \cos \theta$ , where  $\theta \in (0, \pi/2]$ ; see Figure 3 right. Then:

$$\frac{\|\mathbf{q}\|}{d(\mathbf{p}, B)} \geq \frac{1 - \cos \theta}{\sin \theta} = \tan \frac{\theta}{2} \geq \frac{\theta}{2} \geq \frac{\sin \theta}{2} \geq \frac{d(\mathbf{p}, B)}{2} \quad (58)$$

where we used the tangent half-angle formula and the Taylor expansion of  $\tan \theta$ . This yields  $d(\mathbf{p}, B) \leq \sqrt{2\|\mathbf{q}\|}$ . Thus:

$$\|\mathbf{p}\| \leq \ell + \sqrt{2\|\mathbf{q}\|} \quad (59)$$



But since  $\lambda_i^* \geq 1/\varepsilon^2$  for all  $i \in A_Q$ :

$$\|\mathbf{q}\|^2 = \mathbf{x}^\top Q_0 \mathbf{x} \leq \varepsilon^2 \mathbf{x}^\top Q_* \mathbf{x} = \varepsilon^2 (\mathbf{x} - \boldsymbol{\mu}^*)^\top Q_* (\mathbf{x} - \boldsymbol{\mu}^*) \leq \varepsilon^2 \quad (60)$$

Therefore:

$$\mathbf{x}^\top P \mathbf{x} \leq \frac{1 - \sqrt{5\gamma/4}}{\ell^2} (\ell + \sqrt{2\varepsilon})^2 \leq (1 - \sqrt{5\gamma/4})(1 + \sqrt{2\varepsilon}/\ell)^2 \quad (61)$$

Next, we show that  $\frac{\sqrt{2\varepsilon}}{\ell} \leq \frac{1}{2}\sqrt{5\gamma/4}$ . First,

$$\sqrt{2\varepsilon} = \sqrt{2 \frac{\gamma^3}{32d^2}} = \frac{\gamma\sqrt{\gamma}}{4d} \quad (62)$$

We now temporarily set  $\boldsymbol{\mu}^*$  as the origin. We want to show that the projection of  $1/d E^*$  on  $U$  is contained in  $B$ . Now, the projection of an ellipsoid on the subspace spanned by a subset of its axes is a subset of the ellipsoid itself, and  $U$  is by definition spanned by a subset of the axes of  $E^*$ . Therefore the projection  $P$  of  $1/d E^*$  on  $U$  satisfies  $P \subseteq 1/d E^*$ . Suppose then by contradiction that  $P \not\subseteq B$ . Since  $B = U \cap \mathcal{B}_0$ , this implies that  $1/d E^* \not\subseteq \mathcal{B}_0$ . But by John's theorem,  $1/d E^* \subseteq \text{conv}(S_C)$ , and therefore  $\text{conv}(S_C) \not\subseteq \mathcal{B}_0$ , which is absurd. Therefore  $P \subseteq B$ .

Let us get back to the proof, with  $\boldsymbol{\mu}$  as the origin. On the one hand, the definitions of  $A_P$  and  $U$  imply that the largest semiaxis of  $E^*$  of length  $\ell^* = 1/\sqrt{\min_i \lambda_i^*}$  lies in  $U$ , thus  $P$  has radius at least  $\frac{1}{d}\ell^*$ . On the other hand  $B$  has radius  $\ell$ , and we have seen that  $P \subseteq B$ . Therefore,  $\ell \geq \frac{1}{d}\ell^*$ . Finally, by our assumption on  $\min_i \lambda_i^*$ , we have  $\min_i \lambda_i^* < 5/\gamma^2$  and so  $\ell^* > \gamma/\sqrt{5}$ . Therefore,  $\ell \geq \gamma/\sqrt{5}d$ , which together with (62) guarantees  $\frac{\sqrt{2\varepsilon}}{\ell} \leq \frac{\sqrt{5\gamma}}{4} = \frac{1}{2}\sqrt{5\gamma/4}$ . Thus, continuing (61):

$$\mathbf{x}^\top P \mathbf{x} \leq (1 - \sqrt{5\gamma/4}) \left(1 + \frac{1}{2}\sqrt{5\gamma/4}\right)^2 \quad (63)$$

Now  $(1-x)(1+\frac{x}{2})^2 < 1 - \frac{3}{4}x^2$  for all  $x > 0$ , thus with  $x = \sqrt{5\gamma/4} > \sqrt{\gamma}$  we get:

$$\mathbf{x}^\top P \mathbf{x} < 1 - \frac{3}{4}\gamma \quad (64)$$

By summing (55) and (64), we get:

$$\mathbf{x}^\top P \mathbf{x} + \mathbf{x}^\top Q \mathbf{x} < 1 - \frac{3}{4}\gamma + \frac{\gamma}{4} < 1 \quad (65)$$

**Proof of (2).** Comparing the eigenvalues of  $E$  and  $E^*$ , and using  $\ell \leq 1$  and  $\gamma \leq 1/5$ , we obtain:

$$\frac{\lambda_i}{\lambda_i^*} \geq \begin{cases} \frac{(1-\sqrt{5\gamma/4})/\ell^2}{1/\varepsilon^2} \geq \frac{\varepsilon^2}{2} & i \in A_P \\ \varepsilon > \frac{\varepsilon^2}{2} & i \in A_Q \end{cases} \quad (66)$$

Thus the semiaxes lengths of  $E$  are at most  $\sqrt{2}/\varepsilon$  times those of  $E^*$ . Now let  $E_+^*$  be the set obtained by scaling  $E^*$  by a factor  $2\sqrt{2}/\varepsilon = 64\sqrt{2}d^2/\gamma^3$  about its origin  $\boldsymbol{\mu}^*$ . Note that  $\boldsymbol{\mu}^* \in \text{conv}(S_C)$  and, by item (1),  $\text{conv}(S_C) \subseteq E$ , which implies  $\boldsymbol{\mu}^* \in E$ . Now,  $E_+^*$  contains any set of the form  $\mathbf{y} + \frac{1}{2}E_+^*$  if the latter contains  $\boldsymbol{\mu}^*$ ; this includes the set  $\frac{\sqrt{2}}{\varepsilon}E^*$  centered in  $\boldsymbol{\mu}$ , which in turn contains  $E$  as we already said.

**Proof of (3).** We prove that  $d(\mathbf{x}, \mathcal{B}_0)^2 < \gamma$  for all  $\mathbf{x} \in E$ . Since  $\mathcal{B}_0$  is the unit ball, this implies  $E \subset \sqrt{1+\gamma}\mathcal{B}_0$ . Consider then any such  $\mathbf{x}$ . Let again  $\mathbf{p}, \mathbf{q}$  be the projections of  $\mathbf{x}$  on  $U$  and  $U_\perp$  respectively. Because  $B \subseteq \mathcal{B}_0$ ,  $d(\mathbf{x}, \mathcal{B}_0)^2 \leq d(\mathbf{x}, B)^2 = d(\mathbf{p}, B)^2 + \|\mathbf{q}\|^2$ . See again Figure 3, left, but with  $\mathbf{x}$  possibly outside  $\mathcal{B}_0$ . For the first term, note that

$$d(\mathbf{p}, B) \leq \max_{i \in A_P} \sqrt{1/\lambda_i} - \ell \quad (67)$$

By definition of  $\lambda_i$ , this yields:

$$d(\mathbf{p}, B)^2 \leq \left( \frac{\ell}{\sqrt{1 - \sqrt{5\gamma/4}}} - \ell \right)^2 \leq \left( \frac{1}{\sqrt{1 - \sqrt{5\gamma/4}}} - 1 \right)^2 \quad (\text{because } \ell \leq 1)$$

Now we show that the right-hand side is bounded by  $\frac{3}{4}\gamma$ . Consider  $f(x) = \frac{1}{\sqrt{1-x}} - 1$  for  $x \in [0, 1/2]$ . Now  $\frac{\partial^2 f}{\partial x^2} = \frac{3}{4}(1-x)^{-5/2} > 0$ , so  $f$  is convex. Moreover,  $f(1/2) = \sqrt{2} - 1 < 0.83 \cdot 1/2$ , and clearly  $f(0) = 0 \leq 0.83 \cdot 0$ . By convexity then, for all  $x \in [0, 1/2]$  we have  $f(x) \leq 0.83x$  which implies  $f(x)^2 < 0.75x^2$ . By substituting  $x = \sqrt{5\gamma/4}$ , for all  $\gamma \leq 1/5$  we obtain:

$$d(\mathbf{p}, B)^2 \leq \left( \frac{1}{\sqrt{1 - \sqrt{5\gamma/4}}} - 1 \right)^2 < \frac{3}{4} \cdot \frac{5}{4} \gamma = \frac{15}{16} \gamma \quad (68)$$

Let us now turn to  $\mathbf{q}$ . By definition of  $Q_0$ , of  $Q$ , and of  $\lambda_i$  for  $i \in A_Q$ , we have:

$$\|\mathbf{q}\|^2 = \mathbf{x}^\top Q_0 \mathbf{x} \leq \max_{i \in A_Q} \frac{1}{\lambda_i} \mathbf{x}^\top Q \mathbf{x} = \max_{i \in A_Q} \frac{1}{\varepsilon \lambda_i^*} \mathbf{x}^\top Q \mathbf{x} \quad (69)$$

But  $\mathbf{x}^\top Q \mathbf{x} \leq 1$  since  $\mathbf{x} \in E$ , and recalling that  $\lambda_i^* \geq 1/\varepsilon^2$  for all  $i \in A_Q$ , we obtain:

$$\|\mathbf{q}\|^2 \leq \frac{1}{\varepsilon(1/\varepsilon^2)} = \varepsilon < \frac{\gamma}{16} \quad (70)$$

Finally, by summing (68) and (70):

$$d(\mathbf{x}, B_0)^2 \leq d(\mathbf{p}, B)^2 + \|\mathbf{q}\|^2 < \gamma \quad (71)$$

The proof is complete.

### 3 Supplementary material for Section 6

#### 3.1 Lemma 9

**Lemma 9.** *Let  $b > 0$  be a sufficiently large constant. Let  $S$  be a sample of points drawn independently and uniformly at random from  $X$ . Let  $C = \arg \max_{C_j \in \mathcal{C}} |S \cap C_j|$ , let  $S_C = S \cap C$ , and suppose  $|S_C| \geq bd^2 \ln k$ . If  $E$  is any (possibly degenerate) ellipsoid in  $\mathbb{R}^d$  such that  $S_C = C \cap E$ , then with probability at least  $1/2$  we have  $|C \cap E| \geq |X| \frac{1}{4k}$ . The same holds if we require that  $E \cap (S \setminus S_C) = \emptyset$ , i.e., that  $E$  separates  $S_C$  from  $S \setminus S_C$ .*

*Proof.* Let  $n = |X|$  for short, and for any ellipsoid  $E$  let  $E_X = E \cap X$ . We show that, with  $C$  defined as above, (i) with probability at least  $1 - 1/4$  we have  $|C| \geq n/2k$ , and (ii) with probability at least  $1 - 1/4$ , if  $|C| \geq n/2k$  then  $|E_X \Delta C| \leq 1/2|C|$  where  $\Delta$  denotes symmetric difference. By a union bound, then, with probability at least  $1/2$  we have  $|E \cap C| \geq |C| - |E_X \Delta C| \geq \frac{1}{2}|C| \geq n/4k$ .

(i). Let  $S$  be the multiset of samples drawn from  $X$ , and for every cluster  $C_i \in \mathcal{C}$  let  $N_i$  be the number of samples in  $C_i$ . Let  $s = kbd^2 \ln k$ ; note that  $|S| \leq s$  since there are at most  $k$  clusters. Now fix any  $C_i$  with  $|C_i| < \frac{n}{2k}$ . Then  $\mathbb{E}[N_i] \leq s \frac{|C_i|}{n} < \frac{bd^2 \ln k}{2}$ , and by standard concentration bounds (Lemma 4 in this supplementary material), we have  $\mathbb{P}(N_i \geq bd^2 \ln k) = \exp(-\Omega(b \ln k))$ , which for  $b$  large enough drops below  $1/4k$ . Therefore, the probability that  $N_i \geq bd^2 \ln k$  when taking  $s \leq kbd^2 \ln k$  samples is at most  $1/4k$ . By a union bound on all  $C_i$  with  $|C_i| < n/2k$ , then,  $|C| \geq n/2k$  with probability  $1 - 1/4$ .

(ii). Consider now any  $C_i$  with  $|C_i| \geq n/2k$ . We invoke the generalization bounds of Theorem 6 in this supplementary material with  $\varepsilon = 1/4k$  and  $\delta = 1/4k$ , on the hypothesis class  $\mathcal{H}$  of all (possibly degenerate) ellipsoids in  $\mathbb{R}^d$ . For  $b$  large enough, the generalization error of any ellipsoid  $E$  that contains  $S_C$  is, with probability at least  $1 - 1/4k$ , at most  $1/4k$ , which means  $|E_X \Delta C_i| \leq n/4k \leq 1/2|C_i|$ , as desired. By a union bound on all clusters, with probability at least  $1 - 1/4$  this holds for all  $C_i$  with  $|C_i| \geq n/2k$ . The same argument holds if we require  $E$  to separate  $S \cap C_i$  from  $S \setminus C_i$ , see again Theorem 6. By a union bound with point (i) above, we have  $E \cap C \leq 1/2|C|$  with probability at least  $1/2$ , as claimed.  $\square$

#### 3.2 Proof of Lemma 3

Let  $X_0 = X$  and  $N_0 = n$ , and for all  $i \geq 1$ , let  $X_i$  be the set of points not yet labeled at the end of round  $i$ , let  $N_i = |X_i|$ , and let  $R_i = \mathbb{I}\{N_i \leq N_{i-1}(1 - 1/4k)\}$ . Recall that  $S_C$  is large enough

so that, by Lemma 9 in this supplementary material, we have  $\mathbb{P}(R_i = 1 | X_{i-1}) \geq 1/2$  for all  $i$ . For every  $t \geq 1$  let  $\rho_t = \sum_{i=1}^t R_i$ . Note that:

$$N_t \leq N_0(1 - 1/4k)^{\rho_t} < ne^{-\frac{\rho_t}{4k}} \quad (72)$$

If  $\rho_t \geq 4k \ln(1/\varepsilon)$ , then  $N_t < \varepsilon n$  and  $\text{RECUR}(X, k, \gamma, \varepsilon)$  stops. The number of rounds executed by  $\text{RECUR}(X, k, \gamma, \varepsilon)$  is thus at most  $r_\varepsilon = \min\{t : \rho_t \geq 4k \ln(1/\varepsilon)\}$ .

Now, for all  $i \geq 1$  consider the  $\sigma$ -algebra  $\mathcal{F}_{i-1}$  generated by  $X_0, \dots, X_{i-1}$ , and define:  $Z_i = R_i B_i$ , where  $B_1, B_2, \dots$  are Bernoulli random variables where each  $B_i$  has parameter  $1/(2\mathbb{E}[R_i | \mathcal{F}_{i-1}])$ . Obviously,  $Z_i \leq R_i$ , and thus for all  $t$  we deterministically have:

$$\rho_t = \sum_{i=1}^t R_i \geq \sum_{i=1}^t Z_i \quad (73)$$

Now note that:

$$\mathbb{E}[Z_i | \mathcal{F}_{i-1}] = \mathbb{E}[R_i | \mathcal{F}_{i-1}] \frac{1}{2\mathbb{E}[R_i | \mathcal{F}_{i-1}]} = \frac{1}{2} \quad (74)$$

Now we can prove the theorem. For the first claim, simply note that  $\mathbb{E}[r_\varepsilon] \leq 8k \ln(1/\varepsilon)$ , as this is the expected number of fair coin tosses to get  $4k \ln(1/\varepsilon)$  heads.

For the second claim, consider any  $t \geq 8k \ln n + 6a\sqrt{k} \ln n$ . Letting  $\zeta_t = \sum_{i=1}^t Z_i$ , the event  $r_0 \geq t$  implies  $\zeta_t < 4k \ln n = \frac{t}{2} - 3a\sqrt{k} \ln n = \mathbb{E}[\zeta_t] - \delta$  where  $\delta = 3a\sqrt{k} \ln n$ . By Hoeffding's inequality this event has probability at most  $e^{-2\delta^2/t}$ , and one can check that for all  $a \geq 1$  we have  $\frac{2\delta^2}{t} \geq a \ln n$ .

## 4 Supplementary material for Section 7

### 4.1 Proof of Theorem 4

We state and prove two distinct theorems which immediately imply Theorem 4.

**Theorem 8.** *For all  $0 < \gamma < 1/7$ , all  $d \geq 2$ , and every (possibly randomized) learning algorithm, there exists an instance on  $n \geq 2\left(\frac{1+\gamma}{8\gamma}\right)^{\frac{d-1}{2}}$  points and  $|\mathcal{C}| = 3$  latent clusters such that (1) all clusters have margin  $\gamma$ , and (2) to return with probability  $2/3$  a clustering  $\hat{\mathcal{C}}$  such that  $\Delta(\hat{\mathcal{C}}, \mathcal{C}) = 0$  the algorithm must make  $\Omega(n)$  same-cluster queries in expectation.*

*Proof.* The idea is the following. We define a single set of points  $X \subset \mathbb{R}^d$  and randomize over the choice of the latent PSD matrix  $W$ ; the claim of the theorem follows by applying Yao's minimax principle. Specifically, we let  $X$  be a  $\Theta(\sqrt{\gamma})$ -packing of points on the unit sphere in  $\mathbb{R}^d$ . We show that, for  $\mathbf{x} \in X$  drawn uniformly at random, setting  $W = (1 + \gamma) \text{diag}(x_1^2, \dots, x_d^2)$  makes  $\mathbf{x}$  an outlier, as its distance  $d_W(\mathbf{x}, \mathbf{0})$  from the origin is  $1 + \gamma$ , while every other point is at distance  $\leq 1$ . Since there are roughly  $(1/\gamma)^d$  such points  $\mathbf{x}$  in our set, the bound follows.

We start by defining the points  $X$  in terms of their entry-wise squared vectors. Consider  $S_d^+ = \mathbb{R}_+^d \cap S_d$  where  $S_d = \{\mathbf{x} \in \mathbb{R}^d : \|\mathbf{x}\|_2 = 1\}$  is the unit sphere in  $\mathbb{R}^d$ . We want to show that there exists a set of  $\frac{1}{2}(1/\varepsilon)^{d-1}$  points in  $S_d^+$  whose pairwise distance is bigger than  $\varepsilon/2$ , where  $\varepsilon$  will be defined later. To see this, recall that the packing number of the unit ball  $B_d = \{\mathbf{x} \in \mathbb{R}^d : \|\mathbf{x}\|_2 \leq 1\}$  is  $\mathcal{M}(B, \varepsilon) \geq (1/\varepsilon)^d$ —see, e.g., [6]. For  $\varepsilon/2$  and  $d - 1$ , this implies there exists  $Y \subseteq B_{d-1}$  such that  $|Y| \geq (2/\varepsilon)^{d-1}$  and  $\|\mathbf{y} - \mathbf{y}'\|_2 > \varepsilon/2$  for all distinct  $\mathbf{y}, \mathbf{y}' \in Y$ . Now, consider the lifting function  $f : B_{d-1} \rightarrow \mathbb{R}^d$  defined by  $f(\mathbf{y}) = (\sqrt{1 - \|\mathbf{y}\|_2^2}, y_1, \dots, y_{d-1})$ . Define the lifted set  $Z = \{f(\mathbf{y}) : \mathbf{y} \in Y\}$ . Clearly, every  $\mathbf{z} \in Z$  satisfies  $\|\mathbf{z}\|_2 = 1$  and  $z_0 \geq 0$ , so  $\mathbf{z}$  lies on the northern hemisphere of the sphere  $S_d$ . Moreover,  $\|f(\mathbf{y}) - f(\mathbf{y}')\|_2 \geq \|\mathbf{y} - \mathbf{y}'\|_2$  for any two  $\mathbf{y}, \mathbf{y}' \in Y$ . Hence, we have a set  $Z$  of  $(2/\varepsilon)^{d-1}$  points on the  $d$ -dimensional sphere such that  $\|\mathbf{z} - \mathbf{z}'\|_2 > \varepsilon/2$  for all distinct  $\mathbf{z}, \mathbf{z}' \in Z$ . But a hemisphere is the union of  $2^{d-1}$  orthants, hence some orthant contains at least  $2^{-(d-1)}(2/\varepsilon)^{d-1} = (1/\varepsilon)^{d-1}$  of the points of  $Z$ . Without loss of generality we may assume this is the positive orthant and denote the set as  $Z^+$ .

We now define the input set  $X \subseteq \mathbb{R}^d$  as follows:

$$X = X^+ \cup X^- = \{\sqrt{z} : z \in Z^+\} \cup \{-\sqrt{z} : z \in Z^+\}$$

Note that  $n = |X| = 2|Z^+| = 2(1/\varepsilon)^{d-1}$ . Next, we show how every  $z \in Z^+$  defines a clustering instance satisfying the constraints of the thesis. For any  $z^* \in Z^+$ ; let  $w = (1 + \gamma)z^*$  and  $W = \text{diag}(w_1, \dots, w_d)$ , which is PSD as required. Define the following three clusters:

$$C' = \{-\sqrt{z^*}\} \quad C'' = \{\sqrt{z^*}\} \quad C = X \setminus (C' \cup C'')$$

where, for  $f : \mathbb{R} \rightarrow \mathbb{R}$ ,  $f(\mathbf{x}) = (f(x_1), \dots, f(x_d))$ . Since  $C'$  and  $C''$  are singletons, they trivially have weak margin  $\gamma$ . We now show that  $C$  has weak margin  $\gamma$  w.r.t. to  $\mu = \mathbf{0}$ ; that is,  $d_W(\mathbf{x}, \mu)^2 > 1 + \gamma$  for  $\mathbf{x} = \pm\sqrt{z^*}$  and  $d_W(\mathbf{x}, \mu)^2 \leq 1$  otherwise. First, note that  $d_W(\mathbf{x}, \mu)^2 = \langle w, \mathbf{x}^2 \rangle$ . Now,

$$d_W(\mathbf{x}, \mu)^2 = \begin{cases} (1 + \gamma) \langle z^*, z^* \rangle = 1 + \gamma & \text{if } \mathbf{x} \in C', C'' \\ (1 + \gamma) \langle z^*, \mathbf{x}^2 \rangle & \text{if } \mathbf{x} \in C \end{cases} \quad (75)$$

However, by construction of  $Z^+$ , we have that for all  $\mathbf{x} \in C$  and  $z = \mathbf{x}^2$ ,

$$(\varepsilon/2)^2 \leq \|z - z^*\|_2^2 = \|z\|_2^2 - 2\langle z, z^* \rangle + \|z^*\|_2^2 = 2(1 - \langle z, z^* \rangle)$$

which implies  $\langle z^*, \mathbf{x}^2 \rangle \leq 1 - (\varepsilon/2)^2/2 = 1 - \varepsilon^2/8 = 1/(1+\gamma)$  for  $\varepsilon = \sqrt{8\gamma/(1+\gamma)}$ . Therefore (75) gives  $d_W(\mathbf{x}, \mu)^2 = (1 + \gamma) \langle z^*, \mathbf{x}^2 \rangle \leq 1$ . This proves  $C$  has weak margin  $\gamma$  as desired.

The size of  $X$  is:

$$n \geq 2 \left( \frac{1}{\sqrt{8\gamma/(1+\gamma)}} \right)^{d-1} = 2 \left( \frac{1+\gamma}{8\gamma} \right)^{\frac{d-1}{2}}$$

Now the distribution of the instances is defined by taking  $z^*$  from the uniform distribution over  $Z^+$ . Consider any deterministic algorithm running over such a distribution. Note that same-cluster queries always return +1 unless at least one of the two queried points is not in  $C$ . As  $C$  contains all points in  $X$  but the symmetric pair  $\sqrt{z^*}, -\sqrt{z^*}$  for a randomly drawn  $z^*$ , a constant fraction of the points in  $X$  must be queried before one element of the pair is found with probability bounded away from zero. Thus, any deterministic algorithm that returns a zero-error clustering with probability at least  $\delta$  for any constant  $\delta > 0$  must perform  $\Omega(n)$  queries. By Yao's principle for Monte Carlo algorithms then (see Section 1.4 above), any randomized algorithm that errs with probability at most  $\frac{1-\delta}{2} \leq \frac{1}{2}$  for any constant  $\delta > 0$  must make  $\Omega(n)$  queries as well.  $\square$

**Theorem 9.** *For all  $\gamma > 0$ , all  $d \geq 48(1 + \gamma)^2$ , and every (possibly randomized) learning algorithm, there exists an instance on  $n = \Omega(\exp(d/(1 + \gamma)^2))$  points and  $|\mathcal{C}| = 2$  latent clusters such that (1) all clusters have margin at least  $\gamma$ , and (2) to return with probability  $2/3$  a clustering  $\hat{\mathcal{C}}$  such that  $\Delta(\hat{\mathcal{C}}, \mathcal{C}) = 0$  the algorithm must make  $\Omega(n)$  same-cluster queries in expectation.*

*Proof.* We exhibit a distribution of instances that gives a lower bound for every algorithm, and then use Yao's minimax principle. Let  $p = \frac{1}{2(1+\gamma)}$ . Consider a set of vectors  $\mathbf{x}_1, \dots, \mathbf{x}_n$  where every entry of each vector  $x_{j,i}$  is i.i.d. and it is equal to 1 with probability  $p$ . Define  $X = \{\mathbf{x}_1, \dots, \mathbf{x}_n\}$ ; note that in general  $|X| \leq n$  since the points might not be all distinct. Let  $\mathbf{x}^* = \mathbf{x}_n$ ,  $C = \{\mathbf{x}_1, \dots, \mathbf{x}_{n-1}\}$ ,  $C' = \{\mathbf{x}^*\}$ . The latent clustering is  $\mathcal{C} = \{C, C'\}$ , and the matrix and center of  $\mathcal{C}$  are respectively  $W = \text{diag}(\mathbf{x}^*)$  and  $\mathbf{c} = \mathbf{0}$ . The algorithms receive in input a random permutation of  $X$ ; clearly, if it makes  $o(|X|)$  queries, then it has vanishing probability to find  $\mathbf{x}^*$ , which is necessary to return the latent clustering  $\mathcal{C}$ .

Now we claim that, if  $d \geq 48(1 + \gamma)^2$ , then we can set  $n = \Omega\left(\exp\left(\frac{d}{48(1+\gamma)^2}\right)\right)$  and with constant probability we will have (i)  $|X| = \Omega(n)$ , and (ii)  $C, C'$  have margin  $\gamma$ . This is sufficient, since the theorem then follows by applying Yao's minimax principle.

Let us first bound the probability that  $|X| < n$ . Note that for any two points  $\mathbf{x}_i, \mathbf{x}_{i'}$  with  $i \neq i'$  we have  $\mathbb{P}(\mathbf{x}_i = \mathbf{x}_{i'}) = ((1-p)^2 + p^2)^d < (1 - \frac{1}{2(1+\gamma)})^d < e^{-\frac{d}{2(1+\gamma)}}$ . Therefore, by a simple union bound over all pairs,  $\mathbb{P}(|X| < n) < n^2 e^{-\frac{d}{2(1+\gamma)}}$ .

Next, we want show that, loosely speaking,  $d_W(\mathbf{x}, \mathbf{c})^2 \simeq dp$  for  $\mathbf{x} \in C'$  whereas  $d_W(\mathbf{x}, \mathbf{c})^2 \simeq dp^2$  for  $\mathbf{x} \in C$ ; this will give the margin.

Now, for any  $\mathbf{x}$ ,

$$d_W(\mathbf{x}, \mathbf{c})^2 = \sum_{i=1}^d x_i^* (x_i - 0)^2 = \begin{cases} \sum_{i=1}^d x_i^* x_i \sim B(d, p^2) & \mathbf{x} \in C \\ \sum_{i=1}^d x_i^* \sim B(d, p) & \mathbf{x} \in C' \end{cases} \quad (76)$$

Where in the last equality we use the fact that the entries are unary, and where with the notation  $B(d, p)$  we refer to a vector of length  $d$  where each entry is equal to 1 with probability  $p$ . Let  $\mu = dp^2$  and  $\mu' = dp$ , let  $\varepsilon = 1/(1+\sqrt{2})$ , and define

$$\phi = \mu(1 + \varepsilon), \quad \phi' = \mu'(1 - \varepsilon\sqrt{p}) \quad (77)$$

By standard tail bounds,

$$\mathbb{P}(d_W(\mathbf{x}, \mathbf{c})^2 \geq \phi) \leq e^{-\frac{\varepsilon^2 \mu}{3}} \quad \text{for } \mathbf{x} \in C \quad (78)$$

$$\mathbb{P}(d_W(\mathbf{x}, \mathbf{c})^2 < \phi') < e^{-\frac{\varepsilon^2 p \mu'}{3}} = e^{-\frac{\varepsilon^2 \mu}{3}} \quad \text{for } \mathbf{x} \in C' \quad (79)$$

By a union bound on all points, the margin  $\gamma_C$  of  $C$  fails to satisfy the following inequality with probability at most  $|X|e^{-\frac{\varepsilon^2 \mu}{3}} \leq ne^{-\frac{\varepsilon^2 \mu}{3}}$ :

$$1 + \gamma_C = \frac{\min_{\mathbf{x} \notin C} d_W(\mathbf{x}, \mathbf{c})^2}{\max_{\mathbf{x} \in C} d_W(\mathbf{x}, \mathbf{c})^2} \geq \frac{\phi'}{\phi} = \frac{dp(1 - \varepsilon\sqrt{p})}{dp^2(1 + \varepsilon)} = \frac{1 - \varepsilon\sqrt{p}}{p(1 + \varepsilon)} \geq \frac{1}{2p} = 1 + \gamma \quad (80)$$

where the penultimate inequality holds since  $\frac{1 - \varepsilon\sqrt{p}}{1 + \varepsilon} \geq \frac{1}{2}$  for our values of  $p$  and  $\varepsilon$ . Note that, since  $p = \frac{1}{2(1+\gamma)}$  and  $n \leq \frac{1}{c} \exp\left(\frac{d}{48(1+\gamma)^2}\right) + 1$ ,

$$ne^{-\frac{\varepsilon^2 \mu}{3}} = ne^{-\frac{dp^2}{12}} = ne^{-\frac{d}{48(1+\gamma)^2}} \quad (81)$$

By one last union bound, the probability that  $|X| = n$  and  $\gamma_C \geq \gamma$  is at least

$$1 - ne^{-\frac{d}{48(1+\gamma)^2}} - n^2 e^{-\frac{d}{2(1+\gamma)}} \quad (82)$$

If  $d \geq \frac{48}{(1+\gamma)^2}$ , then we can let  $n = \Omega\left(e^{\frac{d}{48(1+\gamma)^2}}\right)$  while ensuring the above probability is bounded away from 0.

The rest of the proof and the application of Yao's principle is essentially identical to the proof of Theorem 8 above.  $\square$

## 5 Comparison with SCQ- $k$ -means

In this section we compare our algorithm to SCQ- $k$ -means of [1]. We show that, in our setting, SCQ- $k$ -means fails even on very simple instances, although it can still work under (restrictive) assumptions on  $\gamma$ ,  $W$ , and the centers.

SCQ- $k$ -means works as follows. First, the center of mass  $\mu_C$  of some cluster  $C$  is estimated using  $\mathcal{O}(\text{poly}(k, 1/\gamma))$  SCQ queries; second, all points in  $X$  are sorted by their distance from  $\mu_C$  and the radius of  $C$  is found via binary search. The binary search is done using same-cluster queries between the sorted points and any point already known to be in  $C$ . The margin condition ensures that, if we have an accurate enough estimate of  $\mu_C$ , then the binary search will be successful (there are no inversions of the sorted points w.r.t. their cluster). This approach thus yields a  $\mathcal{O}(\ln n)$  SCQ queries bound (the number of queries to estimate  $\mu_C$  is independent of  $n$ ).

It is easy to see that this algorithm relies crucially on (1) each cluster  $C$  must be spherical, and (2) the center of the sphere must coincide with the centroid  $\mu_C$ . In formal terms, the setting of [1] is a special cases of ours where for all  $C$  we have  $W_C = I_d$  and  $\mathbf{c} = \mathbb{E}_{\mathbf{x} \in C}[\mathbf{x}]$ . If any of these two assumptions does not hold, then it is easy to construct instances where [1] fails to recover the clusters and, in fact, achieves error very close to a completely random labeling. Formally:

**Lemma 10.** For any fixed  $d \geq 2$ , any  $p \in (0, 1)$ , and any sufficiently small  $\gamma > 0$ , there are arbitrarily large instances on  $n$  points and  $k = 2$  clusters on which SCQ- $k$ -means incurs error  $\Delta(\hat{\mathcal{C}}, \mathcal{C}) \geq \frac{1-p}{2}$  with probability at least  $1 - p$ .

*Sketch of the proof.* We describe the generic instance on  $n$  points for  $d = 2$ . The latent clustering  $\mathcal{C}$  is formed by two clusters  $C_1, C_2$  of size respectively  $n_1 = n \frac{1+p}{2}$  and  $n_2 = n \frac{1-p}{2}$ . In  $C_1$ , half of the points are in  $(1, 0)$  and half in  $(-1, 0)$ . In  $C_2$ , all points are in  $(0, \frac{\sqrt{1+\gamma}}{2})$ . (One can in fact perturb the instance so that all points are distinct without impairing the proof). For both clusters, the center coincide with their center of mass,  $\mu_1 = (0, 0)$  and  $\mu_2 = (0, \frac{\sqrt{1+\gamma}}{2})$ . For both clusters, the latent metric is given by the PSD matrix  $W = \begin{pmatrix} .25 & 0 \\ 0 & 1 \end{pmatrix}$ . It is easy to see that  $d_W(\mathbf{x}, \mu_1)^2 = 1/4$  if  $\mathbf{x} \in C_1$  and  $d_W(\mathbf{x}, \mu_1)^2 = (1+\gamma)/4$  if  $\mathbf{x} \in C_2$ , and so  $C_1$  has margin exactly  $\gamma$ . On the other hand  $C_2$  has margin  $\gamma$  since  $d_W(\mathbf{x}, \mu_2)^2 = 0$  if  $\mathbf{x} \in C_2$  and  $d_W(\mathbf{x}, \mu_2)^2 > 0$  otherwise.

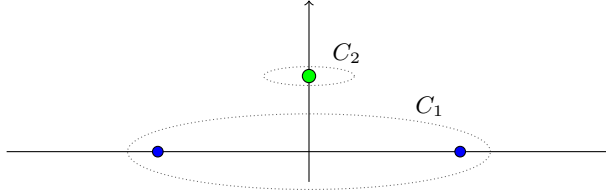

Figure 4: A bad instance for SCQ- $k$ -means. With good probability, the algorithm classifies all points in a single cluster, incurring error  $\simeq 1/2$ , the same as a random labeling.

Now consider SCQ- $k$ -means. The algorithm starts by sampling at least  $\frac{k \ln(k)}{\gamma^4}$  points from  $X$  and setting  $\hat{\mu}$  to the average of the points with the majority label. By standard concentration bounds then, for  $\gamma$  small enough, with probability at least  $1 - p$  the majority cluster will be  $C_1$  and the estimate  $\hat{\mu}$  of its center of mass  $(0, 0)$  will be sufficiently close to  $\mu_1$  that the ordering of all points in  $X$  by their Euclidean distance w.r.t.  $\hat{\mu}$  will set all of  $C_2$  before all of  $C_1$ . But since  $n_2 = n \frac{1-p}{2}$ , the median of the sorted sequence will be a point of  $C_1$ . Thus the binary search will make its first query on a point of  $C_1$  and will continue thereafter classifying all of  $X$  as belonging to  $C_1$ . Thus the algorithm will output the clustering  $\hat{\mathcal{C}} = \{X, \emptyset\}$  which gives  $\Delta(\hat{\mathcal{C}}, \mathcal{C}) = \frac{1-p}{2}$ .  $\square$

Next, we show that the approach [1] still works if one relaxes the assumption  $W = I$ , at the price of strengthening the margin  $\gamma$ . Let  $\lambda_{\max}$  and  $\lambda_{\min} > 0$  be, respectively, the largest and smallest eigenvalues of  $W$ . The condition number  $\kappa_W$  of  $W$  is the ratio  $\lambda_{\max}/\lambda_{\min}$ . If  $\kappa_W$  is not too large, then  $W$  does not significantly alter the Euclidean metric, and the ordering of the points is preserved. Formally:

**Lemma 11.** Let  $\kappa_W$  be the condition number of  $W$ . If every cluster  $C$  has margin at least  $\kappa_W - 1$  with respect to its center of mass  $\mu_C$ , and if we know  $\mu_C$ , then we can recover  $C$  with  $\mathcal{O}(\ln n)$  SCQ queries.

*Proof.* Fix any cluster  $C$  and let  $\mu = \mu_C$ . For any  $\mathbf{z} \in \mathbb{R}^d$  we have  $\lambda_{\min} \|\mathbf{z}\|_2^2 \leq \|\mathbf{z}\|_W^2 \leq \lambda_{\max} \|\mathbf{z}\|_2^2$  where  $\lambda_{\min}$  and  $\lambda_{\max}$  are, respectively, the smallest and largest eigenvalue of  $W$ . Sort all other points  $\mathbf{x}$  by their Euclidean distance  $\|\mathbf{x} - \mu\|_2$  from  $\mu$ . Then, for any  $\mathbf{x} \in C$  and any  $\mathbf{y} \notin C$  we have:

$$\frac{\|\mathbf{y} - \mu\|_2^2}{\|\mathbf{x} - \mu\|_2^2} \geq \frac{\lambda_{\min} \|\mathbf{y} - \mu\|_W^2}{\lambda_{\max} \|\mathbf{x} - \mu\|_W^2} = \frac{1}{\kappa_W} \frac{d(\mathbf{y}, \mu)^2}{d(\mathbf{x}, \mu)^2} > \frac{1 + \gamma}{\kappa_W} \quad (83)$$

Hence, if  $\gamma \geq \kappa_W - 1$ , there is  $r \geq 0$  such that  $\|\mathbf{x} - \mu\|_2 \leq r$  for all  $\mathbf{x} \in C$  and  $\|\mathbf{y} - \mu\|_2 \geq r$  all  $\mathbf{y} \notin C$ . We can thus recover  $C$  via binary search as in [1].  $\square$

As a final remark, we observe that the above approach is rather brittle, since  $\kappa_W$  is unknown (because  $W$  is), and if the condition  $\kappa_W \leq 1 + \gamma$  fails, then once again the binary search can return a clustering far from the correct one.

## 6 Comparison with metric learning

In this section we show that metric learning, a common approach to latent cluster recovery and related problems, does not solve our problem even when combined with same-cluster and comparison queries. Intuitively, we want to learn an approximate distance  $\hat{d}$  that preserves the ordering of the distances between the points. That is, for all  $\mathbf{x}, \mathbf{y}, \mathbf{z} \in X$ ,  $d(\mathbf{x}, \mathbf{y}) \leq d(\mathbf{x}, \mathbf{z})$  implies  $\hat{d}(\mathbf{x}, \mathbf{y}) \leq \hat{d}(\mathbf{x}, \mathbf{z})$ . If this holds then  $d$  and  $\hat{d}$  are equivalent from the point of view of binary search. To simplify the task, we may equip the algorithm with an additional *comparison query* CMP, which takes in input two pairs of points  $\mathbf{x}, \mathbf{x}'$  and  $\mathbf{y}, \mathbf{y}'$  from  $X$  and tells precisely whether  $d(\mathbf{x}, \mathbf{x}') \leq d(\mathbf{y}, \mathbf{y}')$  or not. It turns out that, even with SCQ+CMP queries, learning such a  $\hat{d}$  requires to query essentially all the input points.

**Theorem 10.** *For any  $d \geq 3$ , learning any  $\hat{d}$  such that, for all  $\mathbf{x}, \mathbf{y}, \mathbf{z} \in X$ , if  $d(\mathbf{x}, \mathbf{y}) \leq d(\mathbf{x}, \mathbf{z})$  then  $\hat{d}(\mathbf{x}, \mathbf{y}) \leq \hat{d}(\mathbf{x}, \mathbf{z})$ , requires  $\Omega(n)$  SCQ+CMP queries in the worst case, even with an arbitrarily large margin  $\gamma$ .*

*Proof.* We reduce the problem of learning the order of pairwise distances induced by  $W$ , which we call ORD, to the problem of learning a separator hyperplane, which we call SEP and whose query complexity is linear in  $n$ .

Problem SEP is as follows. The inputs are a set  $X = \{\mathbf{x}_1, \dots, \mathbf{x}_n\} \subset \mathbb{R}^d$  (the observations) and a set  $\mathcal{H} = \{\mathbf{h}_1, \dots, \mathbf{h}_k\} \subset \mathbb{R}_+^d$  (the hypotheses). We require that  $\mathbf{h}_j \in \mathbb{R}_+^d$ . We have oracle access to  $\sigma : X \rightarrow \{+1, -1\}$  such that  $\sigma(\cdot) = \text{sgn}\langle \mathbf{h}, \cdot \rangle$  for some  $\mathbf{h} \in \mathcal{H}$ . The output is the  $\mathbf{h} \in \mathcal{H}$  that agrees with  $\sigma$ . We assume  $\mathcal{H}, X$  support a margin:  $\exists \varepsilon > 0$ , possibly dependent on the instance, such that  $\text{sgn}\langle \mathbf{h}, \mathbf{x} \rangle = \text{sgn}\langle \mathbf{h}, \mathbf{x}' \rangle$  for all  $\mathbf{x}'$  with  $\|\mathbf{x} - \mathbf{x}'\| \leq \varepsilon$ . (Note that this is *not* the cluster margin  $\gamma$ ).

Let  $Q_{\text{ORD}}(n)$  and  $Q_{\text{SEP}}(n)$  be the query complexities of ORD and SEP on  $n$  points. We show:

**Lemma 12.**  $Q_{\text{ORD}}(3n) \leq Q_{\text{SEP}}(n)$ .

*Proof.* Let  $X = \{\mathbf{x}_1, \dots, \mathbf{x}_n\} \subseteq \mathbb{R}^d$  be the input points for SEP and let  $\mathbf{h} \in \mathbb{R}_+^d$  be the target hypothesis. By scaling the dataset we can assume  $\|\mathbf{x}_i\| \leq \varepsilon$  for any desired  $\varepsilon$  (even dependent on  $n$ ). We define an instance of ORD on  $n' = 3n$  points as follows. First,  $W = \text{diag}(\mathbf{h})$ . Second, the input set is  $X' = S_1 \cup \dots \cup S_n$  where for  $i = 1, \dots, n$  we define  $S_i = \{\mathbf{a}_i, \mathbf{b}_i, \mathbf{c}_i\}$  with:

$$\mathbf{a}_i = 6^i \cdot \mathbf{1} \tag{84}$$

$$\mathbf{b}_i = 2 \cdot \mathbf{a}_i \tag{85}$$

$$\mathbf{c}_i = 3 \cdot \mathbf{a}_i + \mathbf{x}_i \tag{86}$$

We first show that a solution to ORD gives a solution of SEP. Suppose indeed that for all pairs of points  $\{\mathbf{q}, \mathbf{p}\}, \{\mathbf{x}, \mathbf{y}\}$  we know whether  $d_W(\mathbf{q}, \mathbf{p}) \leq d_W(\mathbf{x}, \mathbf{y})$ . This is equivalent to knowing the output of  $\text{CMP}(\{\mathbf{q}, \mathbf{p}\}, \{\mathbf{x}, \mathbf{y}\})$ , which is

$$\text{CMP}(\{\mathbf{q}, \mathbf{p}\}, \{\mathbf{x}, \mathbf{y}\}) = \text{sgn} \langle \mathbf{h}, (\mathbf{q} - \mathbf{p})^2 - (\mathbf{x} - \mathbf{y})^2 \rangle \tag{87}$$

Consider then the point  $\mathbf{q} = \mathbf{c}_i, \mathbf{p} = \mathbf{x} = \mathbf{b}_i, \mathbf{y} = \mathbf{a}_i$  for each  $i$ . Then:

$$\text{CMP}(\{\mathbf{q}, \mathbf{p}\}, \{\mathbf{x}, \mathbf{y}\}) = \text{sgn} \langle \mathbf{h}, (\mathbf{a}_i - \mathbf{b}_i)^2 - (\mathbf{b}_i - \mathbf{c}_i)^2 \rangle \tag{88}$$

$$= \text{sgn} \langle \mathbf{h}, (\mathbf{a}_i)^2 - (-\mathbf{a}_i - \mathbf{x}_i)^2 \rangle \tag{89}$$

$$= \text{sgn} \langle \mathbf{h}, 2 \cdot 6^i \mathbf{x}_i - \mathbf{x}_i^2 \rangle \tag{90}$$

$$= \text{sgn} \left\langle \mathbf{h}, \mathbf{x}_i \left( 1 - \frac{\mathbf{x}_i}{2 \cdot 6^i} \right) \right\rangle \tag{91}$$

By the margin hypothesis, for  $\varepsilon$  small enough this equals  $\text{sgn}(\langle \mathbf{h}, \mathbf{x}_i \rangle)$ , i.e., the label of  $\mathbf{x}_i$  in SEP.

We now show that all the other queries reveal no information about the solution of SEP. Suppose then the points are not in the form  $\mathbf{q} = \mathbf{c}_i, \mathbf{p} = \mathbf{x} = \mathbf{b}_i, \mathbf{y} = \mathbf{a}_i$ . Without loss of generality, we can assume that  $\mathbf{q} > \mathbf{p}$  and  $\mathbf{q} \geq \mathbf{x} > \mathbf{y}$ . It is then easy to see that, for  $\varepsilon$  small enough,  $(\mathbf{q} - \mathbf{p})^2 - (\mathbf{x} - \mathbf{y})^2 > 0$  or  $(\mathbf{q} - \mathbf{p})^2 - (\mathbf{x} - \mathbf{y})^2 < 0$ . This holds independently of the  $\mathbf{x}_i$  and of  $W$  and therefore gives no information about the solution of SEP.

It follows that, if we can solve ORD in  $f(3n)$  CMP queries, then we can solve SEP in  $f(n)$  queries. Finally, note that adding SCQ queries does not reduce the query complexity (e.g., let  $X$  lie in a single cluster). For the same reason, we can even assume an arbitrarily large cluster margin  $\gamma$ .  $\square$

It remains to show that SEP requires  $\Omega(n)$  CMP queries in the worst case. This is well known, but we need to ensure that  $\mathcal{H} \subset \mathbb{R}_+^d$  and that any  $h \in \mathcal{H}$  supports a margin as described above.

Consider the following set  $X = \{\mathbf{x}_1, \dots, \mathbf{x}_n\} \subseteq \mathbb{R}^3$ :

$$\mathbf{x}_i = (1 - \delta, -\cos(\theta_i), -\sin(\theta_i)) \quad (92)$$

where  $\theta_i = i \frac{\pi}{2n}$  and  $\delta$  is sufficiently small. Let  $\mathcal{H} = \{\mathbf{h}_1, \dots, \mathbf{h}_n\}$ , where

$$\mathbf{h}_j = (1, \cos(\theta_j), \sin(\theta_j)) \quad (93)$$

Note that  $\mathcal{H} \subset \mathbb{R}_+^d$  as required. Clearly:

$$\langle \mathbf{h}_j, \mathbf{x}_i \rangle = \begin{cases} -\delta & \text{if } j = i \\ 1 - (\delta + \cos(\theta_i - \theta_j)) & \text{if } j \neq i \end{cases} \quad (94)$$

By choosing  $\delta = \frac{1 - \cos(\pi/2n)}{2}$  we have  $\text{sgn} \langle \mathbf{h}, \mathbf{x}_i \rangle = -1$  if and only if  $i = j$ . Clearly, any algorithm needs to probe  $\Omega(n)$  labels to learn  $h$  with constant probability for some  $h \in \mathcal{H}$ . Finally, note that any  $h$  supports a margin, as required.  $\square$

## References

- [1] Hassan Ashtiani, Shrinu Kushagra, and Shai Ben-David. Clustering with same-cluster queries. In *Advances in Neural Information Processing Systems 29*, pages 3216–3224. 2016.
- [2] Devdatt Dubhashi and Alessandro Panconesi. *Concentration of Measure for the Analysis of Randomized Algorithms*. Cambridge University Press, New York, NY, USA, 1st edition, 2009.
- [3] Hervé Fournier and Olivier Teytaud. Lower bounds for comparison based evolution strategies using vc-dimension and sign patterns. *Algorithmica*, 59(3):387–408, March 2011.
- [4] Rajeev Motwani and Prabhakar Raghavan. *Randomized Algorithms*. Cambridge University Press, USA, 1995.
- [5] Shai Shalev-Shwartz and Shai Ben-David. *Understanding Machine Learning: From Theory to Algorithms*. Cambridge University Press, USA, 2014.
- [6] Roman Vershynin. *High-Dimensional Probability: An Introduction with Applications in Data Science*. Cambridge Series in Statistical and Probabilistic Mathematics. Cambridge University Press, 2018.
